# Supplementary material
Source: PubMed Central journal article supplement (PMC4807626)
Supplement: NIHMS759469-supplement-1.pdf [file NIHMS759469-supplement-1.pdf]

# Supporting Material

## General Equations

### Sarcolemmal Membrane Potential

Sarcolemmal membrane potential. In this study, two forms of electrical stimuli are utilized to trigger LCC opening and CICR, “voltage clamp” and “current clamp”. The “voltage clamp” protocol forces a step change in sarcolemmal membrane potential while a small inward current,  $I_{app}$ , is applied in the “current clamp” protocol to elicit an action potential. The sarcolemmal membrane potential during “current-clamp” mode is governed by

$$-C_m \frac{dV}{dt} = \left( I_{lcc}^T + I_{lcc,nj} + I_{ncx} + I_{nak} + I_{pmca} + I_{k1} + I_{kss} + I_{ktof} + I_{ktos} + I_b + I_{app} \right) \quad (S1)$$

where  $C_m$  is the membrane capacitance,  $I_{na}$  is the fast sodium ( $Na^+$ ) current,  $I_{k1}$  is the inwardly rectifying  $K^+$  current,  $I_{kss}$  is the non-inactivating steady-state voltage-activated  $K^+$  current,  $I_{ktof}$  is the rapidly inactivating transient outward potassium  $K^+$  current,  $I_{ktos}$  is the slowly inactivating transient outward potassium  $K^+$  current,  $I_{nak}$  is the  $Na^+/K^+$  pump current,  $I_{ncx}$  is the  $Na^+/Ca^{2+}$  exchanger (NCX) current,  $I_{pmca}$  is the plasma membrane  $Ca^{2+}$ -ATPase (PMCA) current,  $I_{lcc}^T$  is the whole-cell, junctional L-type  $Ca^{2+}$  (LCC) current,  $I_{lcc,nj}$  is the whole-cell, non-junctional L-type  $Ca^{2+}$  current, and  $I_{app}$  is the stimulus current applied during cell pacing.  $I_b$ , represents the combined background  $Ca^{2+}$ ,  $Na^+$ , and  $K^+$  currents. The formulation of  $K^+$  currents can be found below and are primarily based on the currents from the mouse action potential model by Bondarenko and co-workers [1]. The fast  $Na^+$  current is adapted from [2] and is also outlined below.

### Concentration Balance Equations

The Monte Carlo model presented here consists of  $2N + 4$  ( $N = 20,000$ ) ODEs representing the time-evolution of various intracellular ion concentrations (i.e.,  $[Ca^{2+}]_i$ ,  $[K^+]_i$ ,  $[Na^+]_i$ , etc). Consistent with Fig. 1, the concentration balance equations are

$$\frac{[Ca^{2+}]_i}{dt} = \beta_{myo} \left( J_{efflux}^T - J_{ncx} - J_{serca} + J_{bca} - J_{pmca} + J_{ryr,nj} + J_{lcc,nj} - J_{buffer} - J_{CaF} \right) \quad (S2)$$

$$\frac{[Ca^{2+}]_{nsr}}{dt} = \frac{\beta_{nsr}}{\lambda_{nsr}} \left( J_{serca} - J_{refill}^T - J_{ryr,nj} \right) \quad (S3)$$

$$\frac{[Ca^{2+}]_{jsr}^n}{dt} = \frac{\beta_{jsr}^n}{\lambda_{jsr}} \left( J_{refill}^T - J_{ryr}^n \right) \quad (S4)$$

$$\frac{[Ca^{2+}]_{ds}^n}{dt} = \frac{\beta_{ds}^n}{\lambda_{ds}} \left( J_{lcc}^n + J_{ryr}^n - J_{efflux} \right) \quad (S5)$$

$$\frac{[Na^+]_i}{dt} = \frac{A_m}{FV_{myo}} \left( I_{na} + I_{bna} + 3I_{ncx} - 3I_{nak} \right) \quad (S6)$$

$$\frac{[K^+]_i}{dt} = \frac{A_m}{FV_{myo}} \left( I_{k1} + I_{kss} + I_{ktof} + I_{ktos} + I_{bk} - 2I_{nak} \right) \quad (S7)$$

where  $1 \leq n \leq N$ ,  $\lambda_{nsr}$ ,  $\lambda_{jsr}$ , and  $\lambda_{ds}$  are volume fractions (see Table S1),  $\beta_{jsr}$  and  $\beta_{nsr}$  are constant fraction buffering constants (see Table S7), and  $\beta_{myo}$  is the dynamic buffering fraction for the bulk myoplasm (see SI Eq. S45). See the SI for ODEs which govern gating variables for non-stochastic channels (i.e.,  $K^+$  and  $Na^+$  channels). Note that all “whole-cell” flux terms (e.g.,  $J_{ncx}$ ,  $J_{ryr}^T$ , etc.) have units of  $\mu M s^{-1}$  (scaled to a liter of cytosol) and are defined in the SI. All currents (e.g.,  $I_{ncx}$ ,  $I_{lcc}^T$ , etc.) have units of pA/pF and are also defined in the SI. Note that the  $[Ca^{2+}]_i$  in each subspace ( $[Ca^{2+}]_{ds}^n$ ) is assumed to be in rapid equilibrium with the  $[Ca^{2+}]_i$  in the respective JSR ( $[Ca^{2+}]_{jsr}^n$ ) and  $[Ca^{2+}]_i$  (see [8, 7, 6]) allowing Eq. S5 to be reduced to an algebraic expression of the form,

$$[Ca^{2+}]_{ds} = \frac{N_{L,O}^n J_{lcc}^0 + v_{efflux} [Ca^{2+}]_i + N_{R,O}^n v_{ryr} [Ca^{2+}]_{jsr}^n}{N_{R,O}^n v_{ryr} + v_{efflux} - N_{L,O}^n J_{lcc}^0} \quad (S8)$$

where  $N_{L,O}^n$  and  $N_{R,O}^n$  represent the number of open LCCs and RyR2s (respectively) at the  $n^{\text{th}}$  CRU. The terms  $J_{lcc}^0$  and  $J_{lcc}^1$  are functions of membrane potential ( $V$ ) and are defined by  $J_{lcc} = J_{lcc}^0 + [Ca^{2+}]_{ds}^n J_{lcc}^1$  with  $J_{lcc}$  as in Eq. S25. This is significant in that reduces the number of ODEs (for intracellular ion concentrations) from  $2N+4$  to  $N+4$ , a nearly 2 fold reduction in computational demand. Each ODE was solved using the first-order Euler method with a variable time-step designed to ensure stability.

### Gating variables for membrane currents.

The gating variables for  $Na^+$  membrane currents are governed by the following ODEs,

$$\frac{dm_{na}}{dt} = \alpha_{m,na}(1 - m_{na}) - \beta_{m,na}m_{na} \quad (S9)$$

$$\frac{dh_{na}}{dt} = \alpha_{h,na}(1 - h_{na}) - \beta_{h,na}h_{na} \quad (S10)$$

$$\frac{dj_{na}}{dt} = \alpha_{j,na}(1 - j_{na}) - \beta_{j,na}j_{na} \quad (S11)$$

where

$$\alpha_m = \frac{320(V + 47.13)}{1 - e^{-0.1(V+47.13)}}$$

$$\beta_m = 80e^{-V/11}$$

$$\alpha_h = 135 * e^{(V+80)/-6.8}$$

$$\beta_h = \frac{7500}{1 + e^{-0.1*(V+11)}}$$

$$\alpha_j = \frac{175e^{(V+100)/-23}}{1 + e^{0.15*(V+79)}}$$

$$\beta_j = \frac{300}{1 + e^{-0.1*(V+32)}}$$

The gating variables for  $K^+$  membrane currents are governed by the following ODEs,

$$\frac{da_{ktof}}{dt} = (1 - a_{ktof})\alpha_{a,ktof} - a_{ktof}\beta_{i,ktof} \quad (S12)$$

$$\frac{di_{ktof}}{dt} = (1 - i_{ktof})\alpha_{i,ktof} - i_{ktof}\beta_{i,ktof} \quad (S13)$$

$$\frac{da_{ktos}}{dt} = \frac{a_{ktos}^{ss} - a_{ktos}}{\tau_{a,ktos}} \quad (S14)$$

$$\frac{di_{ktos}}{dt} = \frac{i_{ktos}^{ss} - i_{ktos}}{\tau_{i,ktos}} \quad (S15)$$

$$\frac{da_{kss}}{dt} = \frac{a_{kss}^{ss} - a_{kss}}{\tau_{kss}} \quad (S16)$$

$$(S17)$$

where

$$\begin{aligned}
\alpha_{a,ktof} &= 180.64e^{0.03577(V+30)} \\
\beta_{a,ktof} &= 395.6e^{-0.06237*(V+30)} \\
\alpha_{i,ktof} &= \frac{0.152e^{-(V+13.5)/7}}{0.067083e^{-(V+33.5)/7} + 1} \\
\beta_{i,ktof} &= \frac{0.95e^{(V+33.5)/7}}{0.051335e^{(V+33.5)/7} + 1} \\
a_{ktos}^{ss} &= (1/(1 + e^{-(V+22.5)/7.7})) \\
\tau_{a,ktos} &= 0.493 \times 10^{-3}e^{-0.0629V} + 2.058 \times 10^{-3} \\
i_{ktos}^{ss} &= (1/(1 + e^{(V+45.2)/5.7})) \\
\tau_{i,ktos} &= (0.27 + 1.05)/(1 + e^{(V+45.2)/5.7}) \\
a_{kss}^{ss} &= (1/(1 + e^{-(V+22.5)/7.7})) \\
\tau_{kss} &= 0.393 \times 10^{-3}e^{-0.0862V} + 0.13 \times 10^{-3}
\end{aligned}$$

### K<sup>+</sup> membrane currents

The fast inactivating K<sup>+</sup> current is given by,

$$I_{ktof} = a_{ktof}i_{ktof}g_{ktof}(V - E_k) \quad (S18)$$

where  $a_{ktof}$  and  $i_{ktof}$  are the activation and inactivation gates, respectively,  $g_{ktof}$  is the conductance, and  $E_k$  is the Nernst reversal potential for K<sup>+</sup> (see Eq. S53). The slowly inactivating K<sup>+</sup> current is given by,

$$I_{ktos} = a_{ktos}i_{ktos}g_{ktos}(V - E_k) \quad (S19)$$

where  $a_{ktos}$  and  $i_{ktos}$  are the activation and inactivation gates, respectively,  $g_{ktos}$  is the conductance, and  $E_k$  is the Nernst reversal potential for K<sup>+</sup> (see Eq. S53). The steady-state (non-inactivating) K<sup>+</sup> current is given by,

$$I_{kss} = a_{kss}g_{kss}(V - E_k) \quad (S20)$$

where  $a_{kss}$  is the activation gate,  $g_{kss}$  is the conductance, and  $E_k$  is the Nernst reversal potential for K<sup>+</sup> (see Eq. S53). The always on K<sup>+</sup> current is given by,

$$I_{k1} = g_{k1}(V - E_k) \quad (S21)$$

where  $g_{k1}$  is the conductance and  $E_k$  is the Nernst reversal potential for K<sup>+</sup> (see Eq. S53). The background K<sup>+</sup> current is given by,

$$I_{bk} = g_{bk}(V - E_k) \quad (S22)$$

where  $g_{bk}$  is the conductance and  $E_k$  is the Nernst reversal potential for K<sup>+</sup> (see Eq. S53).

### Na<sup>+</sup> membrane current

The fast Na<sup>+</sup> current is given by,

$$I_{na} = m_{na}h_{na}j_{na}g_{na}(V - E_{na}) \quad (S23)$$

where  $m_{na}$ ,  $h_{na}$ , and  $j_{na}$  are the gating variables (see Eqs. S9–S11, respectively),  $g_{na}$  is the conductance, and  $E_{na}$  is the Nernst reversal potential for Na<sup>+</sup> (see Eq. S52). The background Na<sup>+</sup> current is given by,

$$I_{bna} = g_{bna}(V - E_{na}) \quad (S24)$$

where  $g_{bna}$  is the conductance and  $E_{na}$  is the Nernst reversal potential for Na<sup>+</sup> (see Eq. S52).

## Ca<sup>2+</sup> Fluxes

### L-type Ca<sup>2+</sup> Channel Flux

The L-type Ca<sup>2+</sup> flux into each of the N diadic spaces ( $J_{lcc}^n$ ) is given by

$$J_{lcc}^n = -\frac{I_{lcc}^n}{zFV_{myo}} \quad (S25)$$

where z is the valency for Ca<sup>2+</sup>, F is Faraday's constant, and  $V_{myo}$  is the volume of the myoplasm in  $\mu\text{L}$ . Accordingly, the inward Ca<sup>2+</sup> current is given by

$$I_{lcc}^n = N_{L,O}^n P_{lcc} \left( \frac{zFV}{V_\theta} \right) \left( \frac{[Ca^{2+}]_{ds}^n e^{V/V_\theta} - 0.341 [Ca^{2+}]_o}{e^{V/V_\theta} - 1} \right) \quad (S26)$$

where  $V_\theta = RT/zF$ ,  $P_{lcc}$  is the single channel permeability of the L-type Ca<sup>2+</sup> channels, and  $N_{L,O}^n$  is the number of open L-type Ca<sup>2+</sup> channels associated with the  $n^{th}$  CRU. Therefore, the whole-cell, junctional LCC current is given by,

$$I_{lcc}^T = \sum_{n=1}^N I_{lcc}^n \quad (S27)$$

### Non-junctional L-type Ca<sup>2+</sup> Channel Flux

The non-junctional L-type Ca<sup>2+</sup> flux into the bulk myoplasm ( $J_{lcc,nj}$  in Eq. 3) is given by

$$J_{lcc,nj} = -\frac{I_{lcc,nj}}{zFV_{myo}} \quad (S28)$$

The inward Ca<sup>2+</sup> current is given by

$$I_{lcc,nj} = \pi_L^0 P_{lcc,nj} \left( \frac{zFV}{V_\theta} \right) \left( \frac{[Ca^{2+}]_i e^{V/V_\theta} - 0.341 [Ca^{2+}]_o}{e^{V/V_\theta} - 1} \right) \quad (S29)$$

where  $\pi_L^0$  is the probability of finding a non-junctional LCC in the open state.

The probability of finding an LCC in each of its 7 states is governed by,

$$\frac{d\pi_L}{dt} = \pi_L Q \quad (S30)$$

where  $\pi_L$  is a  $1 \times M_L$  row vector of state probabilities, Q is the  $M_L \times M_L$  infinitesimal generator matrix for the discrete-state, continuous-time Markov chain used to describe the stochastic gating of the LCC (see Fig. 1 B), and  $M_L$  is the number of states in the LCC model ( $M_L=7$ ). For the seven-state LCC shown in Fig. 1 B,  $\pi_L^0$  is seventh entry in  $\pi_L$ .

### L-type Ca<sup>2+</sup> Channel Transitions

$$v_a = \frac{e^{(V-V_{\theta,1})/V_{\sigma,1}}}{1 + e^{(V-V_{\theta,1})/V_{\sigma,1}}} \quad (S31)$$

$$v_i = 1 - \frac{1}{1 + e^{(V+V_{\theta,2})/V_{\sigma,2}}} + \frac{0.27}{1 + e^{(V_{\theta,3}-V)/V_{\sigma,3}}} \quad (S32)$$

$$v_d = 1 + X_{vd} * \left( 1 - \frac{e^{(V-V_{\theta,4})/V_{\sigma,4}}}{1 + e^{(V-V_{\theta,4})/V_{\sigma,4}}} \right) \quad (S33)$$

$$c = ([Ca^{2+}]_{ds}^n)^{\eta_L} \quad (S34)$$

## Sarcoplasmic/Endoplasmic Reticulum Ca<sup>2+</sup>-ATPase

The sarcoplasmic/endoplasmic reticulum Ca<sup>2+</sup>-ATPase (SERCA) consumes ATP to pump Ca<sup>2+</sup> into the SR from the myoplasm. Tran and co-workers [5] developed a thermodynamically realistic formulation of the SERCA pump along with a simplified “two-state” formulation that is implemented here. The SERCA pump flux takes the form,

$$J_{serca} = 2v_{cycle}A_p \quad (S35)$$

where  $A_p$  is the concentration of SERCA molecules ( $\mu M$ ) and  $v_{cycle}$  is the cycling rate ( $s^{-1}$ ) per pump molecule (see [5])

## Na<sup>+</sup>-Ca<sup>2+</sup> Exchanger

The main pathway by which Ca<sup>2+</sup> is extruded from the myocyte is the Na<sup>+</sup>-Ca<sup>2+</sup> exchanger (NCX) which can be described as

$$J_{ncx} = \frac{-A_m I_{ncx}}{FV_{myo}} \quad (S36)$$

$$I_{ncx} = F_A I_{ncx}^{max} \frac{[Na^+]_i^3 [Ca^{2+}]_o e^{(\eta_{ncx} FV/RT)} - [Na^+]_o^3 [Ca^{2+}]_i e^{(\eta_{ncx}-1)FV/RT}}{\left( (K_{ncx,na})^3 + [Na^+]_o^3 \right) (K_{ncx,ca} + [Ca^{2+}]_o) (1 + k_{ncx}^{sat} e^{(\eta_{ncx}-1)FV/RT})} \quad (S37)$$

where

$$F_A = \left( \frac{[Ca^{2+}]_i^2}{K_{ma,ncx}^2 + [Ca^{2+}]_i^2} \right)$$

and  $I_{ncx}^{max}$  is the maximal NCX current,  $[Ca^{2+}]_o$  is the extracellular  $[Ca^{2+}]$ , and  $[Na^+]_i$  and  $[Na^+]_o$  are the intracellular and extracellular  $[Na^+]$ , respectively. All other parameters are given in Table S9.

## Plasma Membrane Ca<sup>2+</sup>-ATPase

In addition to NCX the sarcolemma extrudes Ca<sup>2+</sup> from the cell via a plasma membrane Ca<sup>2+</sup>-ATPase flux (PMCA) of the form

$$I_{pmca} = I_{pmca}^{max} \left( \frac{[Ca^{2+}]_i^2}{K_{pmca}^2 + [Ca^{2+}]_i^2} \right) \quad (S38)$$

where  $I_{pmca}^{max}$  is the maximal PMCA current.

## Na<sup>+</sup>/K<sup>+</sup> Pump

The Na<sup>+</sup>/K<sup>+</sup> pump (NAK) drives Na<sup>+</sup> out of the cell and K<sup>+</sup> into the cell and to maintain Na<sup>+</sup> and K<sup>+</sup> homeostasis. The NAK membrane current is given by,

$$I_{nak} = I_{nak}^{max} f_{nak} \frac{1}{1 + (K_{m,na}/[Na^+]_i)^{1.5}} \frac{[K^+]_o}{[K^+]_o + K_{m,ko}} \quad (S39)$$

$$f_{nak} = \frac{1}{1 + 0.1245e^{-0.1VF/RT} + 0.0365\sigma_{nak}e^{-VF/RT}}$$

$$\sigma_{nak} = \frac{1}{7} \left( e^{[Na^+]_o/67,300-1} \right)$$

where  $I_{nak}^{max}$  is the maximal NAK current.

## Sarcolemmal Background Ca<sup>2+</sup> Leak

The sarcolemma includes a constant background Ca<sup>2+</sup> influx which balances  $J_{pmca}$  and  $J_{ncx}$  given by

$$J_{bca} = -\frac{A_m I_{bca}}{z F V_{myo}} \quad (S40)$$

where  $z$  is the valency for Ca<sup>2+</sup>,  $I_{bca} = g_{bca}(V - E_{ca})$ ,  $g_{bca}$  is the maximal conductance, and  $E_{ca}$  is the reversal potential for Ca<sup>2+</sup> (see Eq. S51)

## Total JSR refill and dyadic subspace efflux terms

The total refill flux from the NSR to each JSR compartment includes the contribution from each CRU and is given by

$$J_{refill}^T = \sum_{n=1}^N J_{refill}^n = \sum_{n=1}^N \frac{v_{refill}^T}{N} ([Ca^{2+}]_{nsr} - [Ca^{2+}]_{jsr}^n). \quad (S41)$$

and similarly, the total flux out of the  $N$  dyadic subspaces into the bulk myoplasm is given by

$$J_{efflux}^T = \sum_{n=1}^N J_{efflux}^n = \sum_{n=1}^N \frac{v_{efflux}^T}{N} ([Ca^{2+}]_{ds}^n - [Ca^{2+}]_i). \quad (S42)$$

## Junctional RyR2 Ca<sup>2+</sup> Release

The Ca<sup>2+</sup> flux through junctional RyR2s is

$$J_{ryr}^n = N_{R,O}^n v_{ryr,nj} ([Ca^{2+}]_{jsr}^n - [Ca^{2+}]_{ds}^n). \quad (S43)$$

where  $v_{ryr,nj}$  is the non-junctional RyR junctional release rate in s<sup>-1</sup>. Therefore, the whole-cell, junctional RyR2 Ca<sup>2+</sup> flux ( $J_{ryr}^T$ ) is given by,

$$J_{ryr}^T = \sum_{n=1}^N J_{ryr}^n \quad (S44)$$

The JSR luminal Ca<sup>2+</sup> sensitivity formulation is given by,

$$\phi = \phi_b + \left( \frac{[Ca^{2+}]_{jsr}^n}{\phi_m} \right)^{\eta_\phi} \quad (S45)$$

where  $\phi_b$ ,  $\phi_m$ , and  $\eta_\phi$  are constants. The influence of  $\phi$  on RyR2 P<sub>O</sub> can be seen in Fig. S2.

## Non-junctional RyR Ca<sup>2+</sup> Channels

The Ca<sup>2+</sup> flux from non-junctional or “rogue” RyR2s is

$$J_{ryr,nj} = \pi_{ryr,nj}^0 v_{ryr,nj} ([Ca^{2+}]_{nsr} - [Ca^{2+}]_i). \quad (S46)$$

where  $v_{ryr,nj}$  is the total non-junctional RyR release rate in s<sup>-1</sup> and  $\pi_{ryr,nj}^0$  is the fraction of open non-junctional RyRs and solves

$$\frac{d\pi_{ryr,nj}^0}{dt} = \phi k^+ [Ca^{2+}]_i^{\eta_R} (1 - \pi_{ryr,nj}^0) - k^- \pi_{ryr,nj}^0 \quad (S47)$$

where  $\phi$  is the RyR2 luminal sensitivity function (see Eq. 1),  $k^+$  and  $k^-$  are transition rates for a individual RyR as presented in Fig. 1B.

## Slow Buffers

Slow buffers are lumped into the following flux,

$$J_{\text{buffer}} = \frac{d\text{CaB}_{\text{trpn}}}{dt} + \frac{d\text{CaB}_{\text{calm}}}{dt} + \frac{d\text{CaB}_{\text{slm}}}{dt} \quad (\text{S48})$$

where  $\frac{d\text{CaB}_{\text{trpn}}}{dt}$ ,  $\frac{d\text{CaB}_{\text{calm}}}{dt}$ , and  $\frac{d\text{CaB}_{\text{slm}}}{dt}$  are ODEs governing the amount of  $\text{Ca}^{2+}$  bound to each buffer, given by,

$$\begin{aligned} \frac{d\text{CaB}_{\text{trpn}}}{dt} &= k_{\text{on,trpn}}[\text{Ca}^{2+}]_i(\text{B}_{\text{trpn}}^{\text{T}} - \text{CaB}_{\text{trpn}}) - k_{\text{off,trpn}}\text{CaB}_{\text{trpn}} \\ \frac{d\text{CaB}_{\text{calm}}}{dt} &= k_{\text{on,calm}}[\text{Ca}^{2+}]_i(\text{B}_{\text{calm}}^{\text{T}} - \text{CaB}_{\text{calm}}) - k_{\text{off,calm}}\text{CaB}_{\text{calm}} \\ \frac{d\text{CaB}_{\text{slm}}}{dt} &= k_{\text{on,slm}}[\text{Ca}^{2+}]_i(\text{B}_{\text{slm}}^{\text{T}} - \text{CaB}_{\text{slm}}) - k_{\text{off,slm}}\text{CaB}_{\text{slm}} \end{aligned}$$

## $\text{Ca}^{2+}$ Indicators

While not always used, the model is capable of simulation the flux of  $\text{Ca}^{2+}$  onto  $\text{Ca}^{2+}$  indicators (e.g., Fluo-4) given by,

$$J_{\text{CaF}} = \frac{d[\text{CaF}]}{dt} \quad (\text{S49})$$

where  $\frac{d[\text{CaF}]}{dt}$  governs the amount of  $\text{Ca}^{2+}$  bound to the indicator (F) and is given by,

$$\frac{d[\text{CaF}]}{dt} = -k_{\text{off,F}}[\text{CaF}] + k_{\text{on,F}}[\text{Ca}^{2+}]_i \left( [\text{F}]^{\text{T}} - [\text{CaF}] \right) \quad (\text{S50})$$

where  $[\text{F}]^{\text{T}}$  is the total amount of fluorescent indicator in the cytosolic compartment (e.g.,  $50 \mu\text{M}$ ) and  $k_{\text{on,F}}$  and  $k_{\text{off,F}}$  are the on and off rates for  $\text{Ca}^{2+}$  binding to the fluorescent indicator, respectively.

## Nernst reversal potentials

$$E_{\text{ca}} = \frac{RT}{zF} \log \left( \frac{[\text{Ca}^{2+}]_o}{[\text{Ca}^{2+}]_i} \right) \quad (\text{S51})$$

$$E_{\text{na}} = \frac{RT}{zF} \log \left( \frac{[\text{Na}^+]_o}{[\text{Na}^+]_i} \right) \quad (\text{S52})$$

$$E_{\text{k}} = \frac{RT}{zF} \log \left( \frac{[\text{K}^+]_o}{[\text{K}^+]_i} \right) \quad (\text{S53})$$

where  $z$  is the valency for the respective ion.

## Dynamic Buffering Fractions

### Myoplasmic Buffering

Buffering in the myoplasm is approximated using a dynamic buffering fraction given by

$$\beta_{\text{myo}} = \left( 1 + \frac{\text{B}_{\text{myo}}^{\text{T}} K_{\text{m}}^{\text{myo}}}{(K_{\text{m}}^{\text{myo}} + [\text{Ca}^{2+}]_i)^2} \right)^{-1} \quad (\text{S54})$$

where  $\text{B}_{\text{myo}}^{\text{T}}$  is the total myoplasmic buffer concentration,  $K_{\text{m}}^{\text{myo}}$  is the half saturation constant for the myoplasmic buffer.

## Junctional SR Buffering

Buffering in each JSR compartment is approximated using a dynamic buffering fraction given by

$$\beta_{jsr}^n = \left( 1 + \frac{B_{jsr}^T K_m^{jsr}}{(K_m^{jsr} + [Ca^{2+}]_{jsr}^n)^2} \right)^{-1} \quad (S55)$$

where  $B_{jsr}^T$  is the total JSR buffer concentration,  $K_m^{jsr}$  is the half saturation constant for the JSR buffer.

## Fast Subspace

Similar to previous work [7, 8, 6] this model formulation leads to a rapid equilibrium of the  $[Ca^{2+}]_{ds}$  with the  $[Ca^{2+}]_i$  and  $[Ca^{2+}]_{jsr}$ . Thus, in each dyadic subspace we assume a  $[Ca^{2+}]$  ( $[Ca^{2+}]_{ds,ss}^n$ ) that balances the fluxes in and out of that compartment,

$$0 = \frac{\beta_{ds}}{\lambda_{ds}} (J_{lcc}^n + J_{ryr}^n - J_{efflux}^n),$$

that is,

$$[Ca^{2+}]_{ds,ss}^n \approx \frac{N_{L,O}^n J_{lcc}^0 + v_{efflux} [Ca^{2+}]_i + N_{R,O}^n v_{ryr} [Ca^{2+}]_{jsr}^n}{N_{R,O}^n v_{ryr} + v_{efflux} - N_{L,O}^n J_{lcc}^1}. \quad (S56)$$

## 3D Spatial Model

The model describes a single sarcomere ( M-line to M-line) centered on a Z-line that contains numerous equally distributed CRUs. The model geometry is  $4 \times 4 \times 14 \mu m$  with CRUs centered in space and, consistent with experimental findings, separated from one another by 600 nm [61]. The spatial-temporal evolution of  $[Ca^{2+}]_i$  and the  $Ca^{2+}$ -bound Fluo4 concentration ( $[CaF]$ ) were simulated using PDEs for  $[Ca^{2+}]_i$  diffusion and the diffusion of  $Ca^{2+}$ -bound indicator ( $[CaF]$ , i.e., Fluo-4). These reaction-diffusion style equations are as follows,

$$\frac{\delta [Ca^{2+}]_i}{\delta t} \left( \frac{1}{\beta_i} \right) = D_{Ca_i} \nabla^2 [Ca^{2+}]_i + (\lambda_{dsi} J_{efflux} - J_{serca} - J_{ncx} + J_{bca} - J_{buffer} - J_{CaF}) \quad (S57)$$

$$\frac{\delta [CaF]}{\delta t} = D_{CaF} \nabla^2 [CaF] + J_{CaF} \quad (S58)$$

where  $\lambda_{dsi}$  is the volume fraction for subspace to cytosol,  $\beta_i$  is the cytosolic dynamic buffering fraction, and the cytosolic fluxes (e.g.,  $J_{efflux}$ ,  $J_{serca}$ ,  $J_{ncx}$ ,  $J_{bca}$ ,  $J_{buffer}$ , and  $J_{CaF}$ ) retain similar formulations to corresponding fluxes in the compartment model (see above). The PDEs are numerically integrated using a centered difference in space and forward Euler in time solver and the ODEs for  $[Ca^{2+}]_{ds}$  and  $[Ca^{2+}]_{jsr}$  remain unchanged. Linescan images were generated by assessing  $[CaF]$  over time after simulated optical blurring and with the addition of Gaussian noise, as previously described in Smith et al. [62].

## Tables of Model Parameters



Table S1: Model Geometry

| Parameter              | Definition               | Value    |
|------------------------|--------------------------|----------|
| $V_{\text{cell}}$      | Cell volume              | 36 pL    |
| $V_{\text{myo}}$       | Myoplasmic volume        | 18 pL    |
| $V_{\text{nsr}}$       | NSR volume               | 1.152 pL |
| $V_{\text{jsr}}$       | JSR volume               | 0.18 pL  |
| $V_{\text{ds}}$        | Subspace volume          | 54 nL    |
| $\lambda_{\text{nsr}}$ | NSR volume fraction      | 0.064    |
| $\lambda_{\text{jsr}}$ | JSR volume fraction      | 0.01     |
| $\lambda_{\text{ds}}$  | Subspace volume fraction | 0.003    |

Table S2: RyR2  $\text{Ca}^{2+}$  Channel Parameters

| Parameter           | Definition                                        | Value                                     |
|---------------------|---------------------------------------------------|-------------------------------------------|
| $N_R$               | number of RyR2s per CRU                           | 50                                        |
| $k^+$               | RyR $\text{Ca}^{2+}$ association rate constant    | $0.2 \mu\text{M}^{-\eta_R} \text{s}^{-1}$ |
| $k^-$               | RyR $\text{Ca}^{2+}$ disassociation rate constant | $425 \text{s}^{-1}$                       |
| $\eta_R$            | $\text{Ca}^{2+}$ -binding cooperativity factor    | 2.2                                       |
| $\phi_m$            | Luminal $\text{Ca}^{2+}$ regulation coefficient   | 0.8025 mM                                 |
| $\phi_b$            | Luminal $\text{Ca}^{2+}$ regulation coefficient   | 1500                                      |
| $\eta_\phi$         | Luminal $\text{Ca}^{2+}$ regulation coefficient   | 4                                         |
| $v_{\text{ryr}}^T$  | Total junctional RyR2 release rate                | 48                                        |
| $v_{\text{ryr}}$    | single RyR2 release rate                          | $v_{\text{ryr}}/(N \times N_R)$           |
| $v_{\text{ryr,nj}}$ | Total non-junctional RyR2 release rate            | 9.6                                       |

Table S3: L-type  $\text{Ca}^{2+}$  Channel Parameters

| Parameter           | Definition                                                | Value                                      |
|---------------------|-----------------------------------------------------------|--------------------------------------------|
| $N_L$               | Number of LCCs per CRU                                    | 6                                          |
| $M_L$               | Number of states per LCC                                  | 7                                          |
| $\eta_L$            | $\text{Ca}^{2+}$ cooperativity parameter                  | 2                                          |
| $k_{25}$            | $C_2$ to $A_5$ rate constant                              | $450 \text{ s}^{-1}$                       |
| $k_{16}$            | $R_1$ to $R_6$ rate constant                              | $450 \text{ s}^{-1}$                       |
| $k_{34}$            | $I_3$ to $I_4$ rate constant                              | $450 \text{ s}^{-1}$                       |
| $k_{21}$            | $C_2$ to $R_1$ rate constant                              | $31.5 \text{ s}^{-1}$                      |
| $k_{76}$            | $O_7$ to $R_6$ rate constant                              | $31.5 \text{ s}^{-1}$                      |
| $k_{23}$            | $C_2$ to $I_3$ rate constant                              | $0.5 \mu\text{M}^{-\eta_L} \text{ s}^{-1}$ |
| $k_{74}$            | $O_7$ to $I_4$ rate constant                              | $0.5 \mu\text{M}^{-\eta_L} \text{ s}^{-1}$ |
| $k_{12}$            | $R_1$ to $C_2$ rate constant                              | $2 \text{ s}^{-1}$                         |
| $k_{32}$            | $I_3$ to $C_2$ rate constant                              | $2 \text{ s}^{-1}$                         |
| $k_{75}$            | $O_7$ to $A_5$ rate constant                              | $1800 \text{ s}^{-1}$                      |
| $k_{61}$            | $R_6$ to $R_1$ rate constant                              | $500 \text{ s}^{-1}$                       |
| $k_{52}$            | $A_5$ to $C_2$ rate constant                              | $500 \text{ s}^{-1}$                       |
| $k_{43}$            | $I_4$ to $I_3$ rate constant                              | $500 \text{ s}^{-1}$                       |
| $k_{57}$            | $A_5$ to $O_7$ rate constant                              | $400 \text{ s}^{-1}$                       |
| $k_{67}$            | $R_6$ to $O_7$ rate constant                              | $0.4444 \text{ s}^{-1}$                    |
| $k_{47}$            | $R_4$ to $O_7$ rate constant                              | $0.4444 \text{ s}^{-1}$                    |
| $V_{\sigma,1}$      | VDA parameter                                             | 6                                          |
| $V_{\theta,1}$      | VDA parameter                                             | 2                                          |
| $V_{\sigma,3}$      | VDD parameter                                             | 2                                          |
| $V_{\theta,3}$      | VDD parameter                                             | -50                                        |
| $P_{\text{lcc}}^T$  | Total junctional LCC permeability to $\text{Ca}^{2+}$     | 0.0002375                                  |
| $P_{\text{lcc}}$    | single junctional LCC permeability to $\text{Ca}^{2+}$    | $P_{\text{lcc}}^T / (N \times N_L)$        |
| $P_{\text{lcc,nj}}$ | Total non-junctional LCC permeability to $\text{Ca}^{2+}$ | 0.000475                                   |

Table S4:  $\text{K}^+$  current Parameters

| Parameter         | Definition                            | Value                                 |
|-------------------|---------------------------------------|---------------------------------------|
| $g_{\text{ktof}}$ | Maximum $I_{\text{ktof}}$ conductance | $0.45 \text{ mS } \mu\text{F}^{-1}$   |
| $g_{\text{ktos}}$ | Maximum $I_{\text{ktos}}$ conductance | $0.135 \text{ mS } \mu\text{F}^{-1}$  |
| $g_{\text{kss}}$  | Maximum $I_{\text{kss}}$ conductance  | $0.0405 \text{ mS } \mu\text{F}^{-1}$ |
| $g_{\text{k1}}$   | Maximum $I_{\text{k1}}$ conductance   | $0.2 \text{ mS } \mu\text{F}^{-1}$    |
| $g_{\text{bk}}$   | Maximum $I_{\text{bk}}$ conductance   | $0.0082 \text{ mS } \mu\text{F}^{-1}$ |

Table S5:  $\text{Na}^+$  current Parameters

| Parameter        | Definition                           | Value                                 |
|------------------|--------------------------------------|---------------------------------------|
| $g_{\text{na}}$  | Maximum $I_{\text{na}}$ conductance  | $10 \text{ mS } \mu\text{F}^{-1}$     |
| $g_{\text{bna}}$ | Maximum $I_{\text{bna}}$ conductance | $0.0016 \text{ mS } \mu\text{F}^{-1}$ |

Table S6: Pump and Exchanger Parameters

| Parameter        | Definition                                         | Value                      |
|------------------|----------------------------------------------------|----------------------------|
| $I_{pmca}^{max}$ | Maximal PMCA current                               | 0.1875 pA pF <sup>-1</sup> |
| $K_{pmca}$       | Ca <sup>2+</sup> half saturation constant for PMCA | 0.25 μM                    |
| $I_{ncx}^{max}$  | Maximal NCX current                                | 750 pA pF <sup>-1</sup>    |
| $\eta_{ncx}$     | NCX voltage dependence coefficient                 | 0.35                       |
| $K_{ncx,ca}$     | Ca <sup>2+</sup> half saturation constant for NCX  | 1380 μM                    |
| $K_{ncx,na}$     | Na <sup>+</sup> half saturation constant for NCX   | 87500 μM                   |
| $k_{ncx}^{sat}$  | NCX exchange saturation factor                     | 0.1                        |
| $K_{ma,ncx}$     | NCX allosteric activation constant                 | 0.150 μM                   |
| $A_p$            | Concentration of SERCA molecules                   | 150 μM                     |
| $I_{nak}^{max}$  | Maximal $I_{nak}$ current                          | 1.408 pA pF <sup>-1</sup>  |
| $K_{m,nai}$      | half saturation for NaK                            | 21000 μM                   |
| $K_{m,ko}$       | half saturation for NaK                            | 1500 μM                    |

Table S7: Buffering Parameters

| Parameter        | Definition                                                      | Value                     |
|------------------|-----------------------------------------------------------------|---------------------------|
| $\beta_{ds}$     | Subspace Ca <sup>2+</sup> buffering fraction                    | 0.1                       |
| $\beta_{nsr}$    | NSR Ca <sup>2+</sup> buffering fraction                         | 1                         |
| $B_{myo}^T$      | Total myoplasmic Ca <sup>2+</sup> buffer concentration          | 132 μM                    |
| $K_m^{myo}$      | Half saturation constant for myoplasmic Ca <sup>2+</sup> buffer | 0.6 μM                    |
| $B_{jsr}^T$      | Total JSR Ca <sup>2+</sup> buffer concentration                 | 140 × 30 mM               |
| $K_m^{jsr}$      | Half saturation constant for JSR Ca <sup>2+</sup> buffer        | 638 μM                    |
| $B_{trpn}^T$     | Total troponin buffer concentration                             | 140                       |
| $k_{trpn}^{on}$  | Slow troponin buffer on rate                                    | 2.37 s <sup>-1</sup>      |
| $k_{trpn}^{off}$ | Slow troponin buffer off rate                                   | 0.032 s <sup>-1</sup>     |
| $B_{calm}^T$     | Total calmodulin buffer concentration                           | 24                        |
| $k_{calm}^{on}$  | Slow calmodulin buffer on rate                                  | 34 s <sup>-1</sup>        |
| $k_{calm}^{off}$ | Slow calmodulin buffer off rate                                 | 238 s <sup>-1</sup>       |
| $B_{slm}^T$      | Total sarcolemmal membrane buffer concentration                 | 42                        |
| $k_{slm}^{on}$   | Slow sarcolemmal membrane buffer on rate                        | 100 s <sup>-1</sup>       |
| $k_{slm}^{off}$  | Slow sarcolemmal membrane buffer off rate                       | 1300 s <sup>-1</sup>      |
| $F_4^T$          | Total Fluo-4 concentration                                      | 50 μM                     |
| $k_{F4}^{on}$    | Slow sarcolemmal membrane buffer on rate                        | 100 s <sup>-1</sup>       |
| $k_{F4}^{off}$   | Slow sarcolemmal membrane buffer off rate                       | 110 s <sup>-1</sup>       |
| $F_{5N}^T$       | Total Fluo-5N concentration                                     | 0 (or 50 if specified) μM |
| $k_{F5N}^{on}$   | Slow sarcolemmal membrane buffer on rate                        | 80 s <sup>-1</sup>        |
| $k_{F5N}^{off}$  | Slow sarcolemmal membrane buffer off rate                       | 32,000 s <sup>-1</sup>    |

Table S8: Initial Conditions

| Parameter         | Definition                            | Value      |
|-------------------|---------------------------------------|------------|
| V                 | Membrane voltage                      | -81 mV     |
| $[Na^+]_i$        | Myoplasmic $[Na^+]$                   | 10.2 mM    |
| $[K^+]_i$         | Myoplasmic $[K^+]$                    | 143.72 mM  |
| $[Ca^{2+}]_i$     | Myoplasmic $[Ca^{2+}]$                | 80 nM      |
| $[Ca^{2+}]_o$     | Extracellular $[Ca^{2+}]$             | 1.8 mM     |
| $[Ca^{2+}]_{ds}$  | Dyadic subspace $[Ca^{2+}]$           | 80 nM      |
| $[Ca^{2+}]_{nsr}$ | Network SR $[Ca^{2+}]$                | 900 mM     |
| $[Ca^{2+}]_{jsr}$ | Junctional SR $[Ca^{2+}]$             | 900 mM     |
| $m_{na}$          | $I_{na}$ activation gate variable     | 0.0015     |
| $h_{na}$          | $I_{na}$ inactivation gate variable   | 0.9849     |
| $j_{na}$          | $I_{na}$ inactivation gate variable   | 0.9905     |
| $a_{ktof}$        | $I_{ktof}$ activation gating variable | 0.0021     |
| $i_{ktof}$        | $I_{ktof}$ inactivation gate variable | 1          |
| $a_{ktos}$        | $I_{ktos}$ activation gate variable   | 2.9871e-04 |
| $i_{ktos}$        | $I_{ktos}$ inactivation gate variable | 0.9994     |
| $a_{kss}$         | $I_{kss}$ activation gate variable    | 0.002      |
| $i_{kss}$         | $I_{kss}$ inactivation gate variable  | 1          |
| $\pi_{ryr,nj}^o$  | fraction of open non-junctional RyR2s | 0          |
| $\pi_{lcc,nj}^o$  | fraction of open non-junctional LCCs  | 0          |

Table S9: Other Parameters

| Parameter      | Definition                                         | Value                                       |
|----------------|----------------------------------------------------|---------------------------------------------|
| F              | Faraday constant                                   | $9.6485 \times 10^4$ coul mol <sup>-1</sup> |
| T              | Temperature                                        | 310 K                                       |
| R              | Ideal gas constant                                 | 8314 J mmol <sup>-1</sup> K <sup>-1</sup>   |
| $g_{bca}$      | Maximal background $Ca^{2+}$ conductance           | $1.1024 \times 10^{-4}$ mS $\mu$ F          |
| $v_{refill}^T$ | Total JSR refill rate                              | 2.5 s <sup>-1</sup>                         |
| $v_{efflux}^T$ | Total rate of $Ca^{2+}$ efflux out of the subspace | 200 s <sup>-1</sup>                         |
| $A_m$          | Capacitative area of cell membrane                 | $1.5340 \times 10^{-4}$ $\mu$ F             |
| z              | Valency for $Ca^{2+}$                              | 2                                           |

## Supporting Material Figures

### Steady-state RyR2 Open Probability

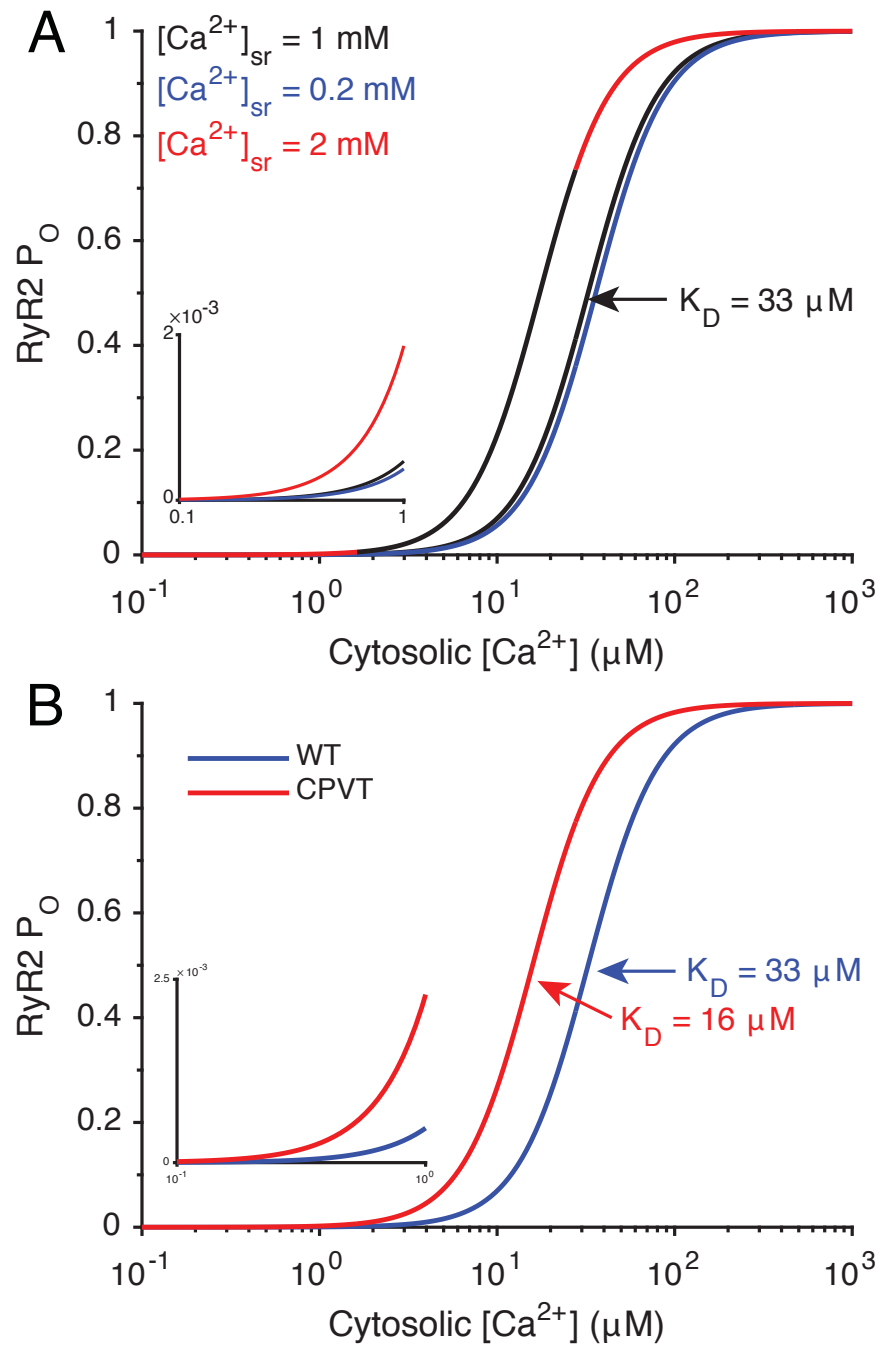

Figure S1: Steady-state RyR2 open probability ( $P_O$ ) as function of  $[Ca^{2+}]_i$ . A) RyR2  $P_O$  for 3 different  $[Ca^{2+}]_{sr}$  levels B) RyR2  $P_O$  for WT and CPVT conditions.

### EC Coupling Gain & Gradedness

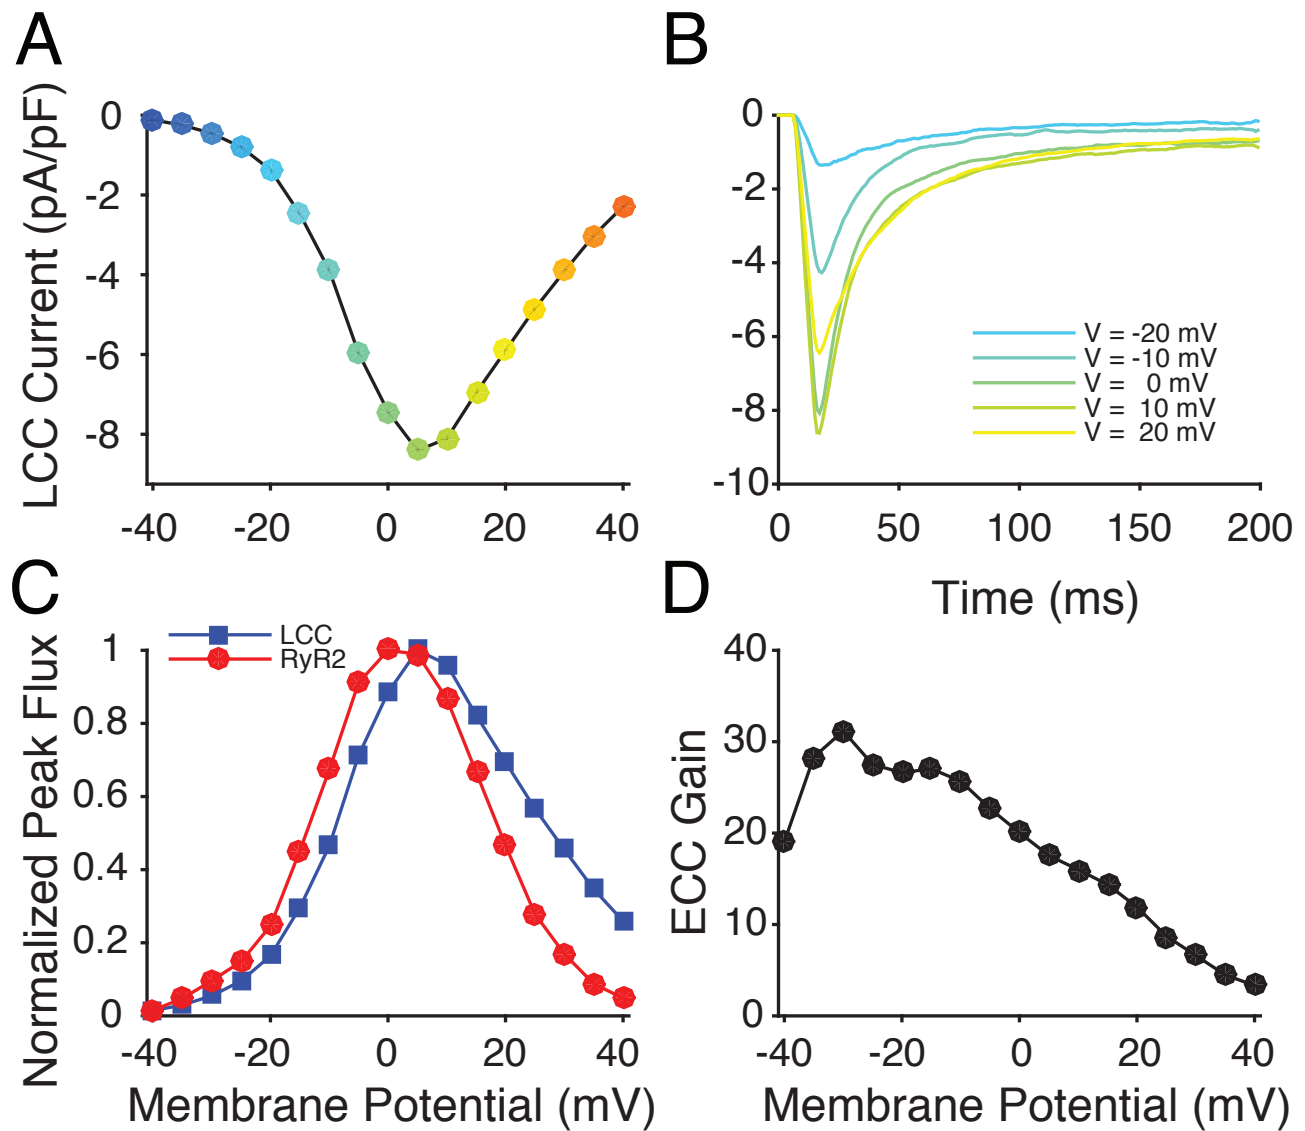

Figure S2: EC Coupling Dynamics. A) Peak LCC current from the novel 7-state LCC (see Fig. 1B) as a function of membrane potential. B) Representative LCC currents for various holding potentials. C) Normalized peak LCC (blue line) and RyR2 (red line) fluxes as function of membrane potential D) ECC gain as defined as peak of  $J_{ryr}^T / J_{lcc}^T$ .

## Quiescent $\text{Ca}^{2+}$ spark dynamics

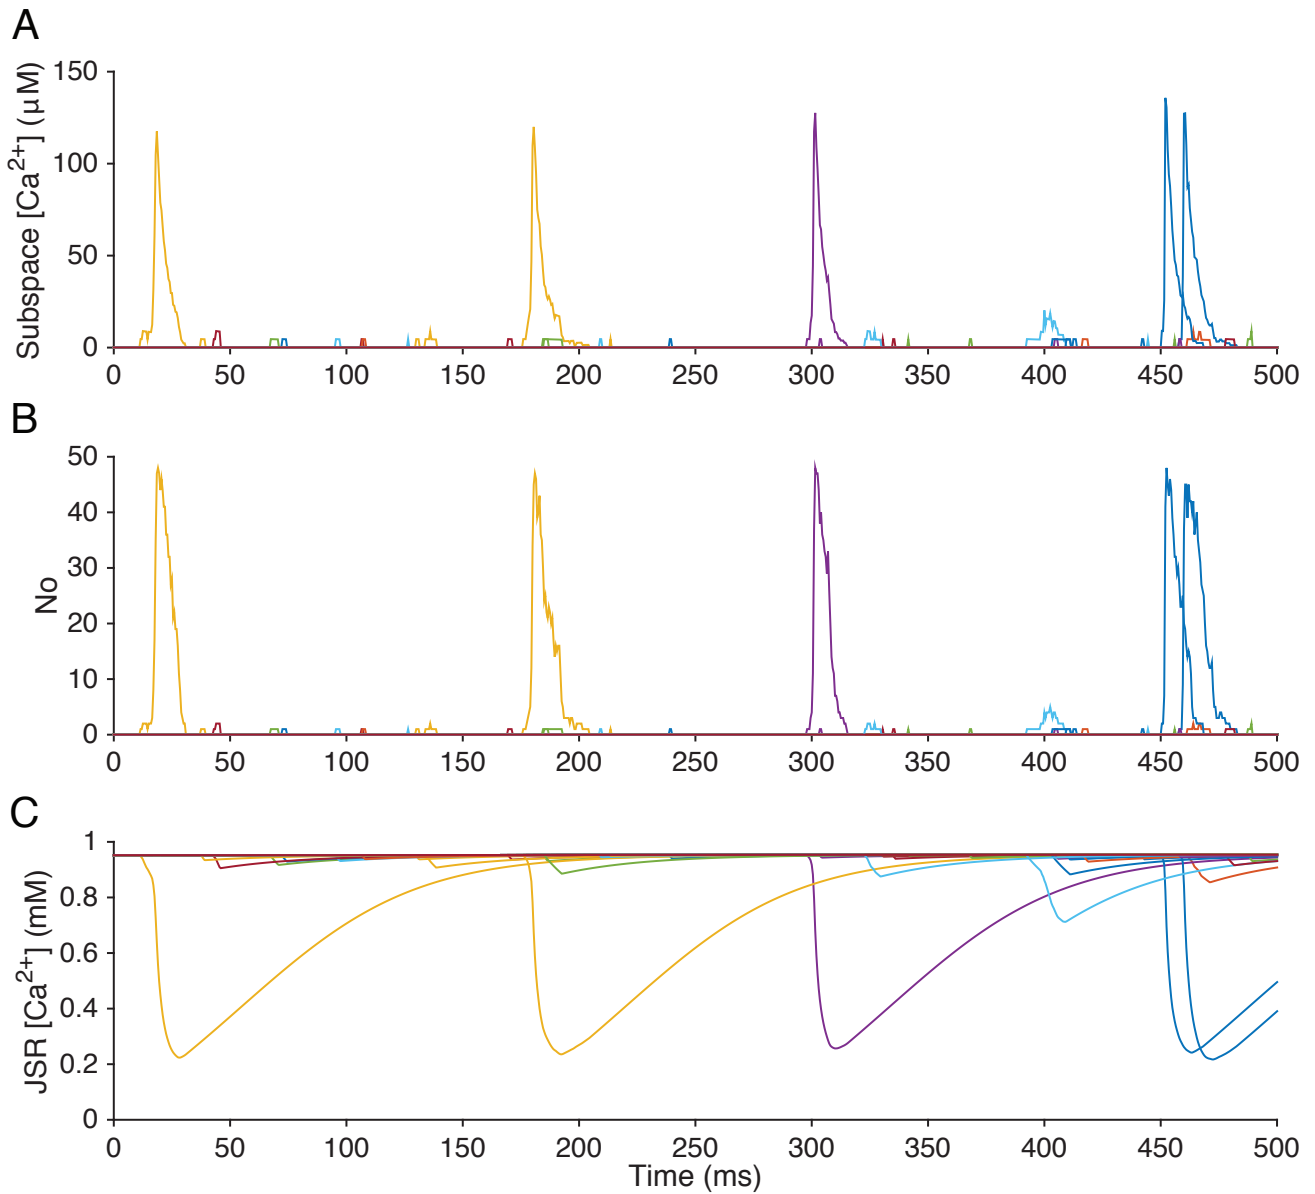

Figure S3:  $\text{Ca}^{2+}$  Sparks and SR  $\text{Ca}^{2+}$  leak under quiescent, **normal** conditions. Time evolution of A)  $[\text{Ca}^{2+}]_{\text{ds}}$ , B)  $N_{\text{R},\text{O}}^n$ , and C)  $[\text{Ca}^{2+}]_{\text{sr}}$  during a 500 ms simulation of a quiescent cardiomyocyte. Each color represents the behavior from a different CRU within the whole-cell model. For clarity only 10% of the cell's 20,000 CRUs are shown.

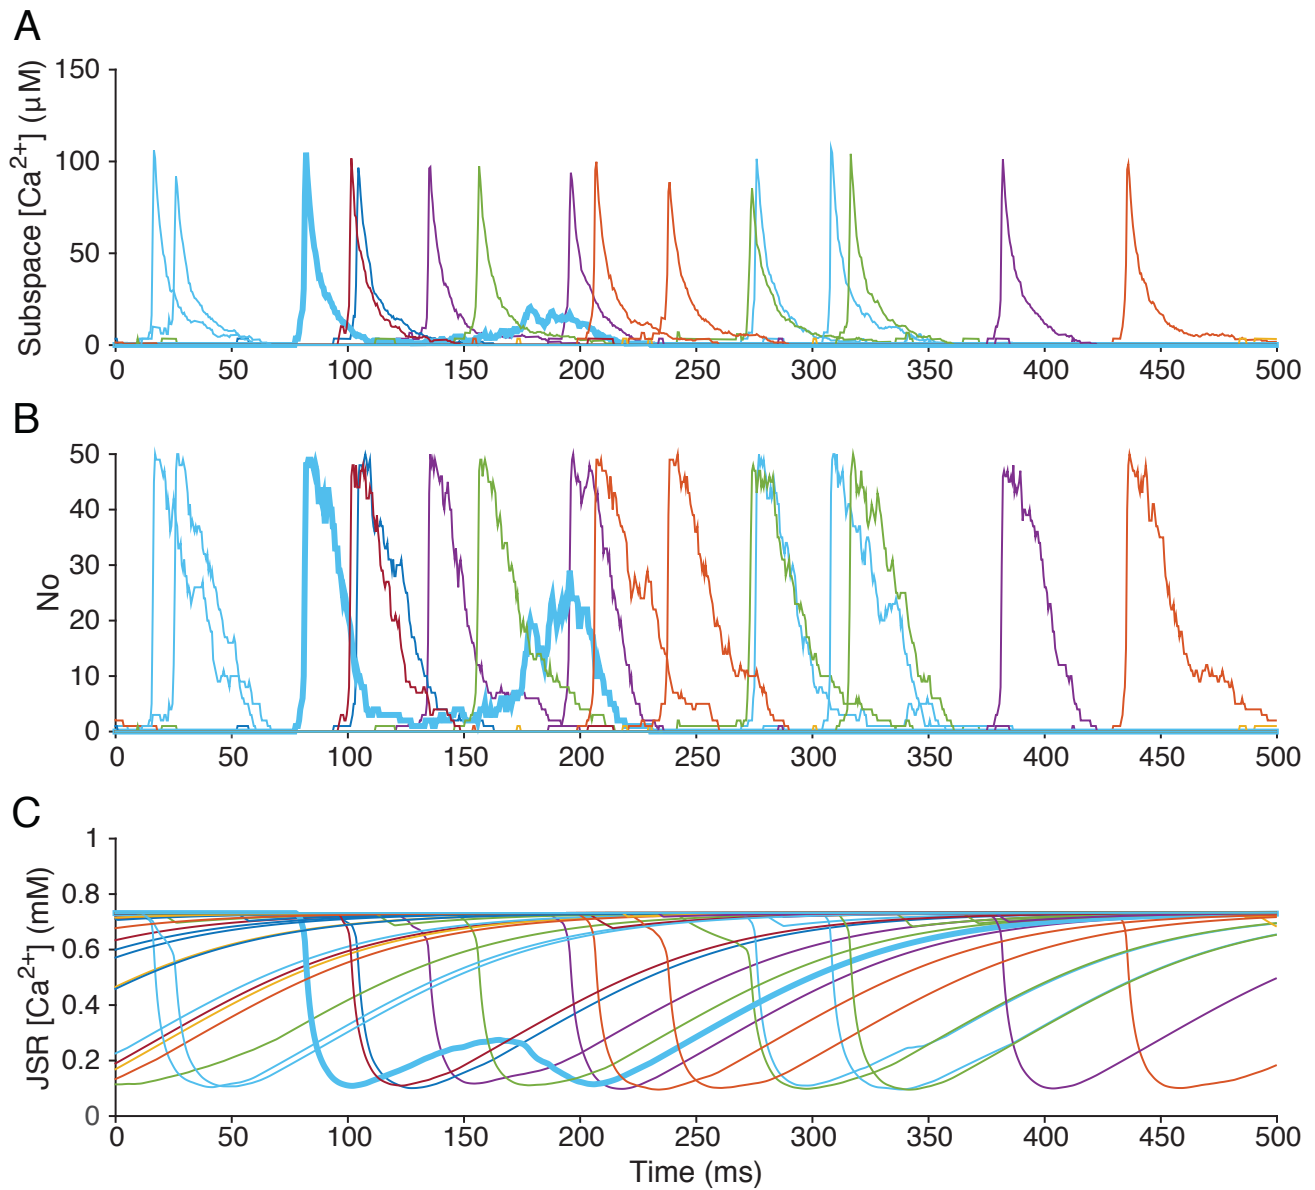

Figure S4:  $Ca^{2+}$  Sparks and SR  $Ca^{2+}$  leak under quiescent, **leaky RyR2** conditions. Time evolution of A)  $[Ca^{2+}]_{ds}$  B)  $N_{R,O}^n$ , and C)  $[Ca^{2+}]_{jsr}$  during a 500 ms simulation of a quiescent cardiomyocyte. Each color represents the behavior from a different CRU within the whole-cell model. For clarity only 10% of the cell's 20,000 CRUs are shown.



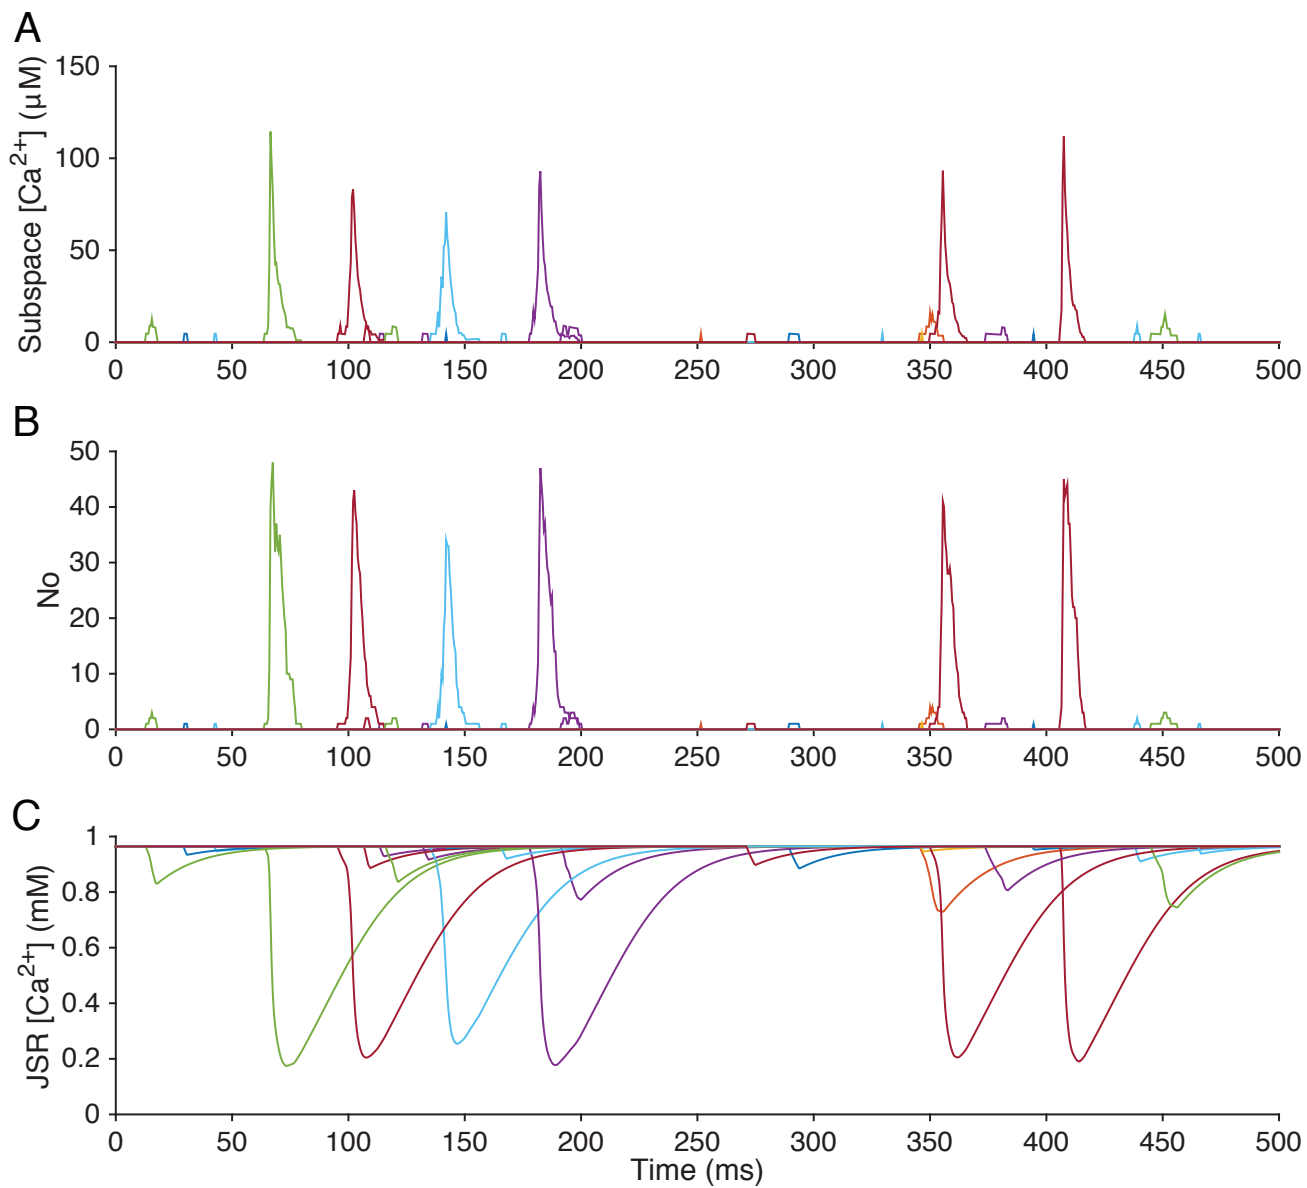

Figure S5:  $Ca^{2+}$  Sparks and SR  $Ca^{2+}$  leak under quiescent, **decreased JSR buffering** conditions. Time evolution of A)  $[Ca^{2+}]_{ds}$  B)  $N_{R,O}^n$ , and C)  $[Ca^{2+}]_{jsr}$  during a 500 ms simulation of a quiescent cardiomyocyte. Each color represents the behavior from a different CRU within the whole-cell model. For clarity only 10% of the cell's 20,000 CRUs are shown.

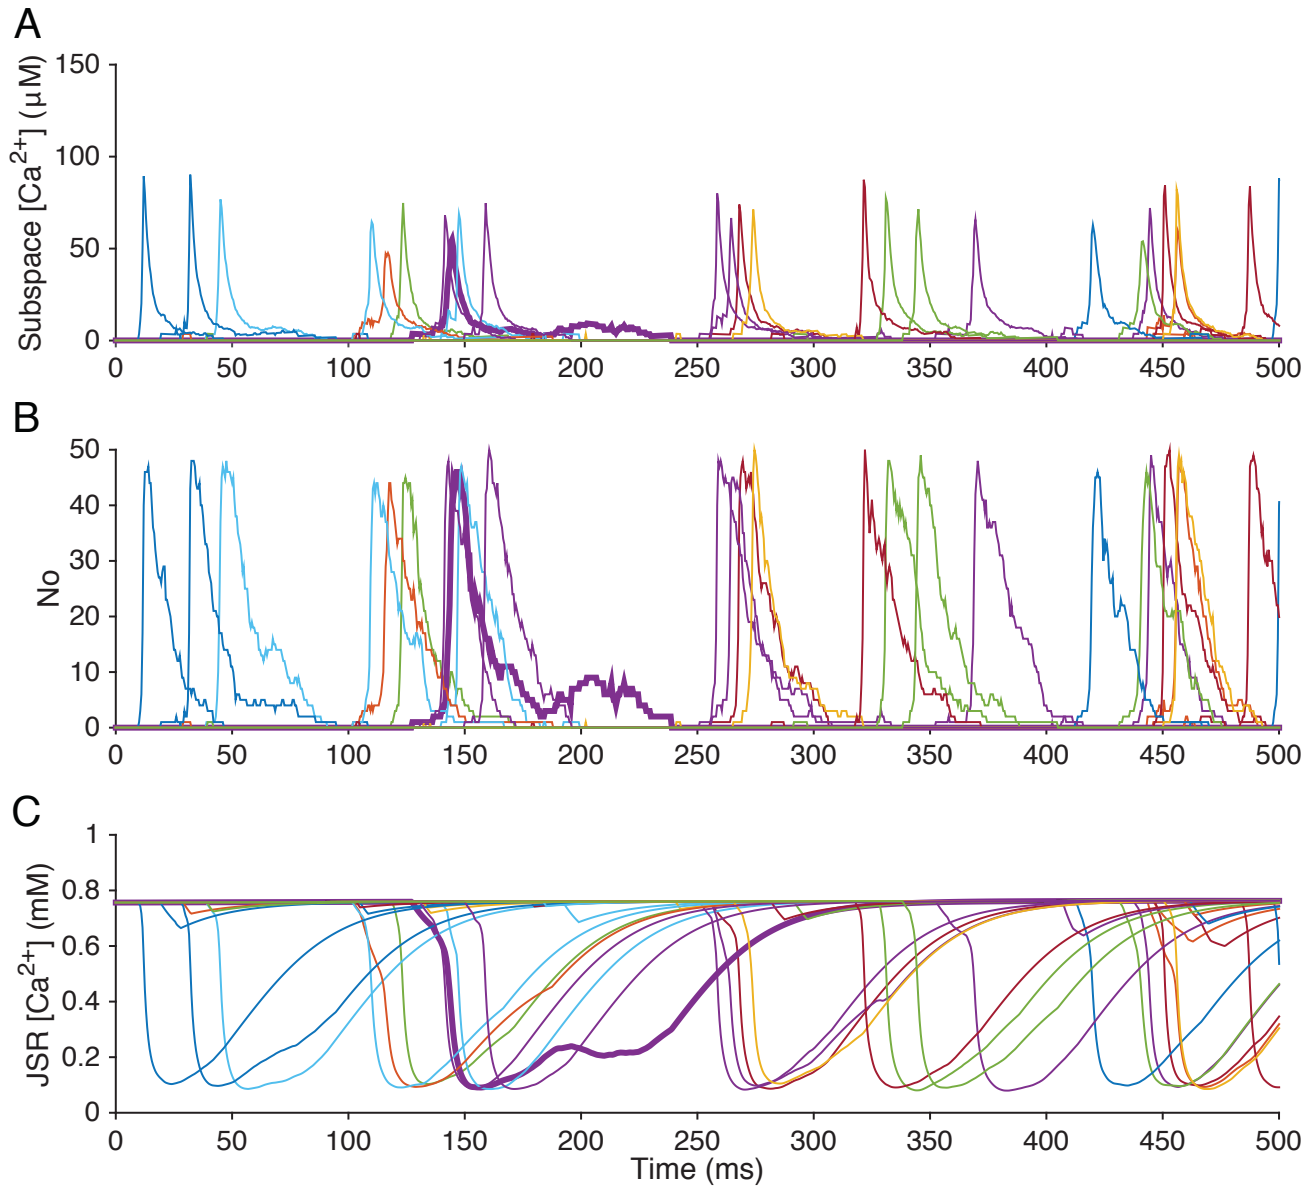

Figure S6:  $Ca^{2+}$  Sparks and SR  $Ca^{2+}$  leak under quiescent, **CPVT** (i.e., leaky RyR2 and decreased JSR buffering) conditions. Time evolution of A)  $[Ca^{2+}]_{ds}$  B)  $N_{R,O}^n$ , and C)  $[Ca^{2+}]_{jsr}$  during a 500 ms simulation of a quiescent cardiomyocyte. Each color represents the behavior from a different CRU within the whole-cell model. For clarity only 10% of the cell's 20,000 CRUs are shown.

## Membrane currents

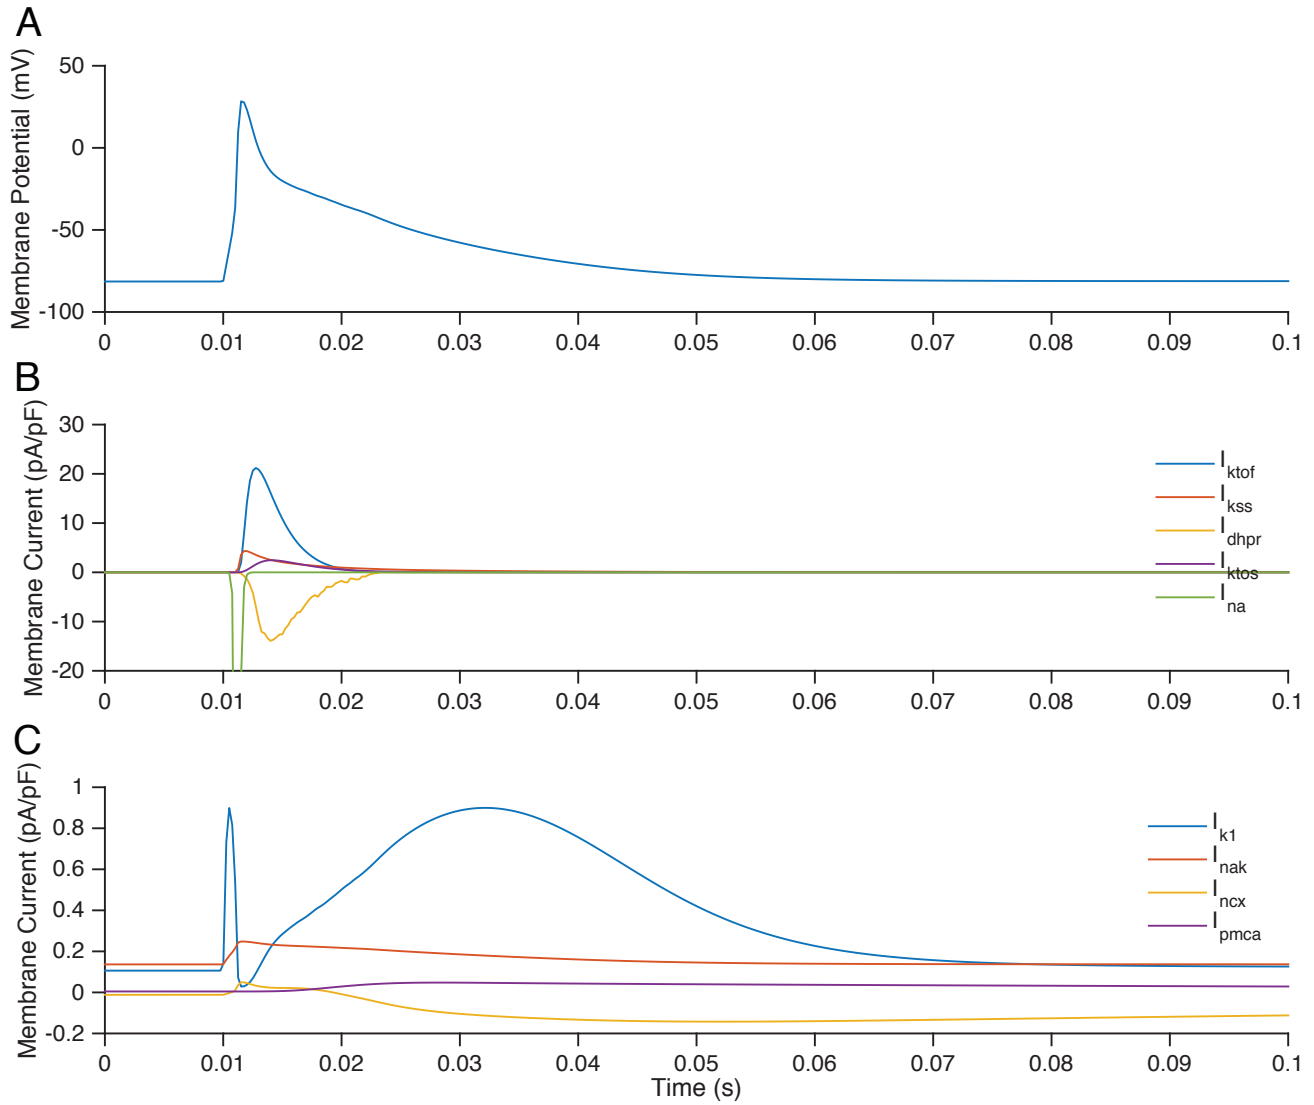

Figure S7: Membrane potential and key sarcolemmal currents during AP.

## Systolic $\text{Ca}^{2+}$ release dynamics

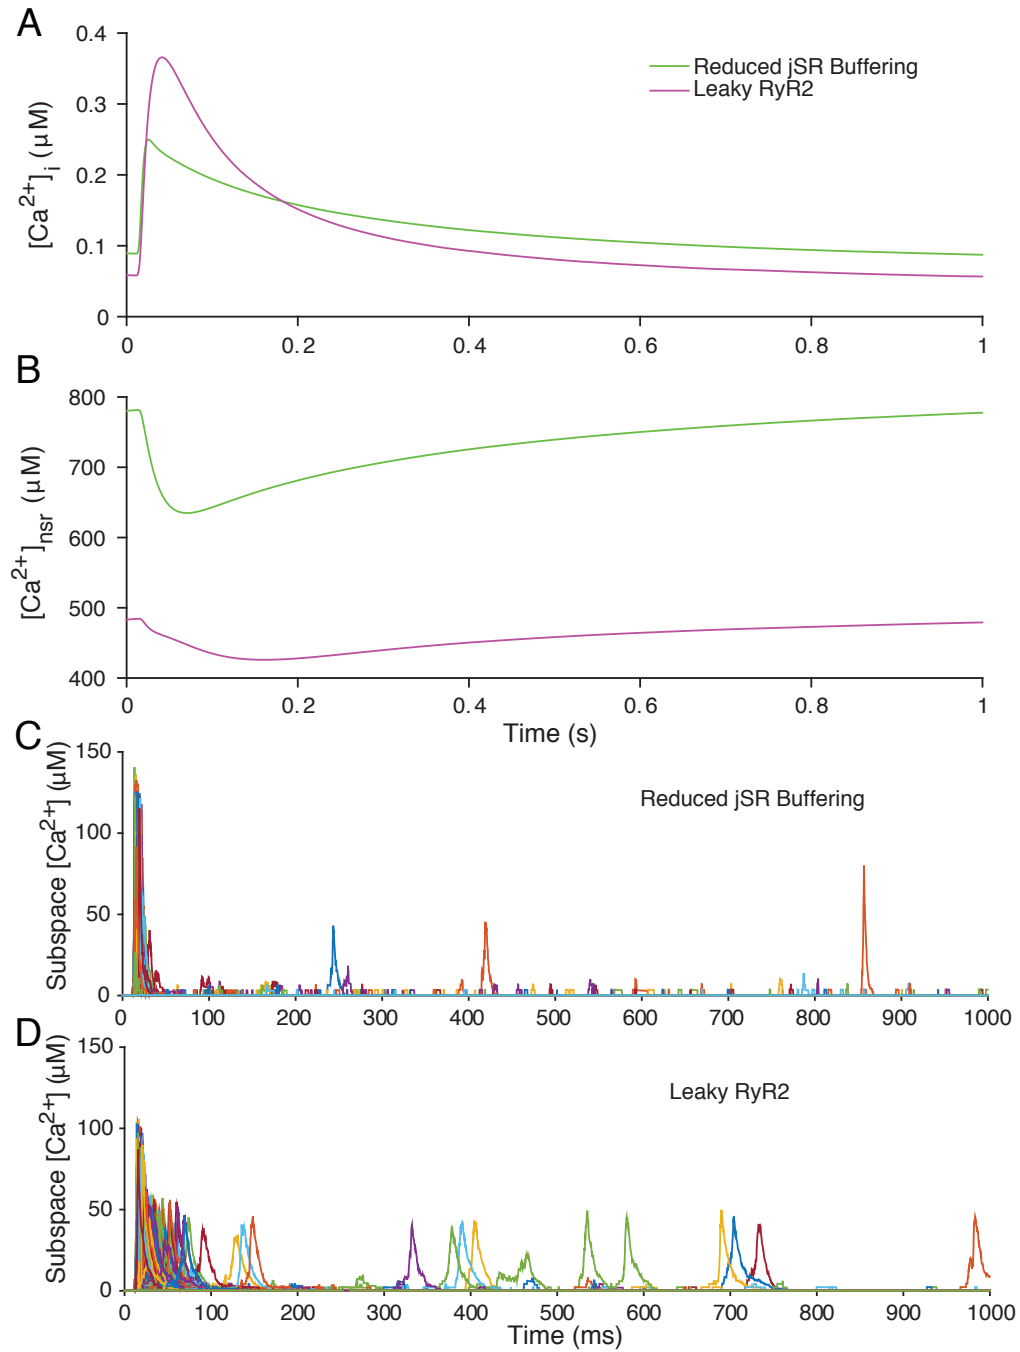

Figure S8: Systolic  $\text{Ca}^{2+}$  release dynamics with reduced JSR buffering and leaky RyR2s. A) Bulk  $[\text{Ca}^{2+}]_i$ ; B) Bulk  $[\text{Ca}^{2+}]_{\text{sr}}$ ; C)  $\text{Ca}^{2+}$  sparks with reduced JSR buffering, and D)  $\text{Ca}^{2+}$  sparks during leaky RyR2 conditions.

## WT spatial $\text{Ca}^{2+}$ release dynamics

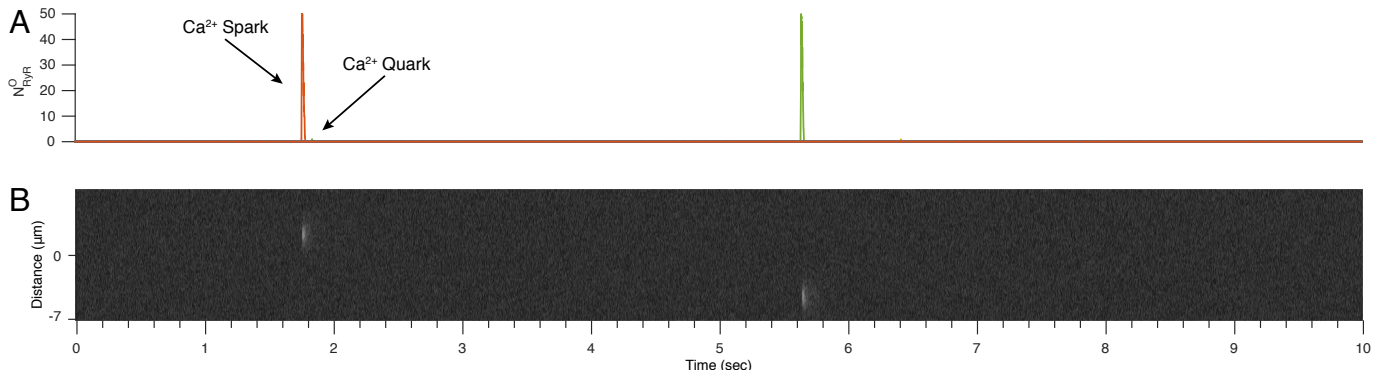

Figure S9:  $\text{Ca}^{2+}$  release behavior during WT . A) Stochastic RyR2 gating during quiescent, WT conditions and B) simulated transverse line-scan of quiescent  $\text{Ca}^{2+}$  release dynamics (as  $F/F_0$ ) during WT conditions. Realistic noise and confocal blurring are added after simulation. Optical blurring was performed using a model point spread function (PSF) consistent with confocal PSFs (i.e., 400 nm in the x,y direction and 800 nm in the z direction). White noise equalling 10% of  $F/F_0$  was added after optical blurring.

### $[Ca^{2+}]_i$ dynamics during rapid pacing

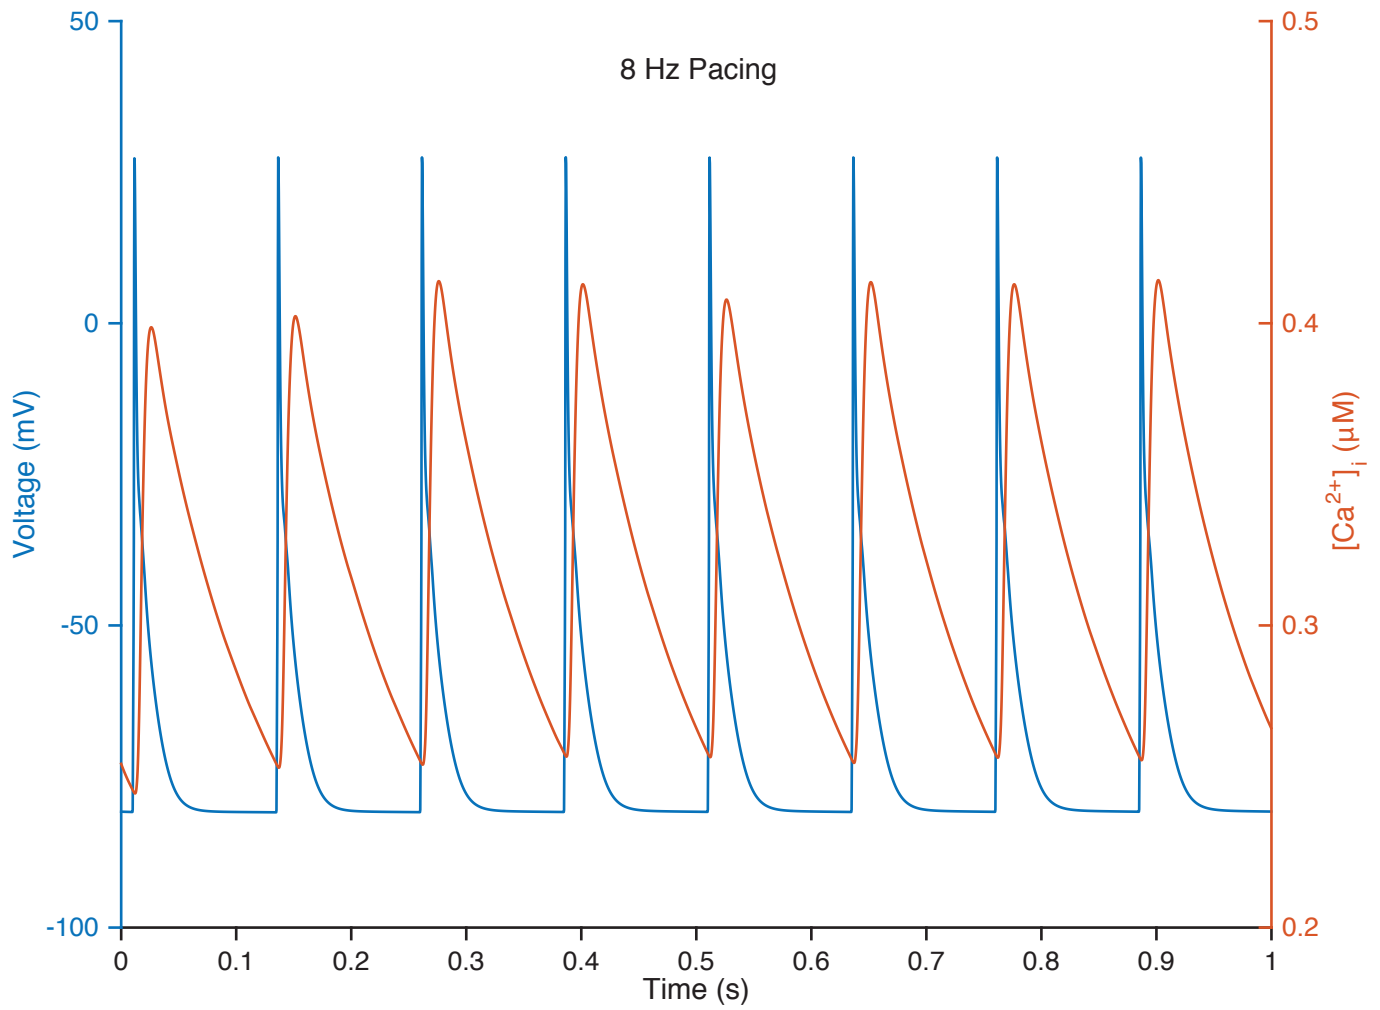

Figure S10: Action potentials (left axis, blue line) and  $[Ca^{2+}]_i$  transients (right axis, red lines) generated by the model at 8 Hz.

## $[Ca^{2+}]_i$ dynamics during perforated-patch APs and Rabbit APs

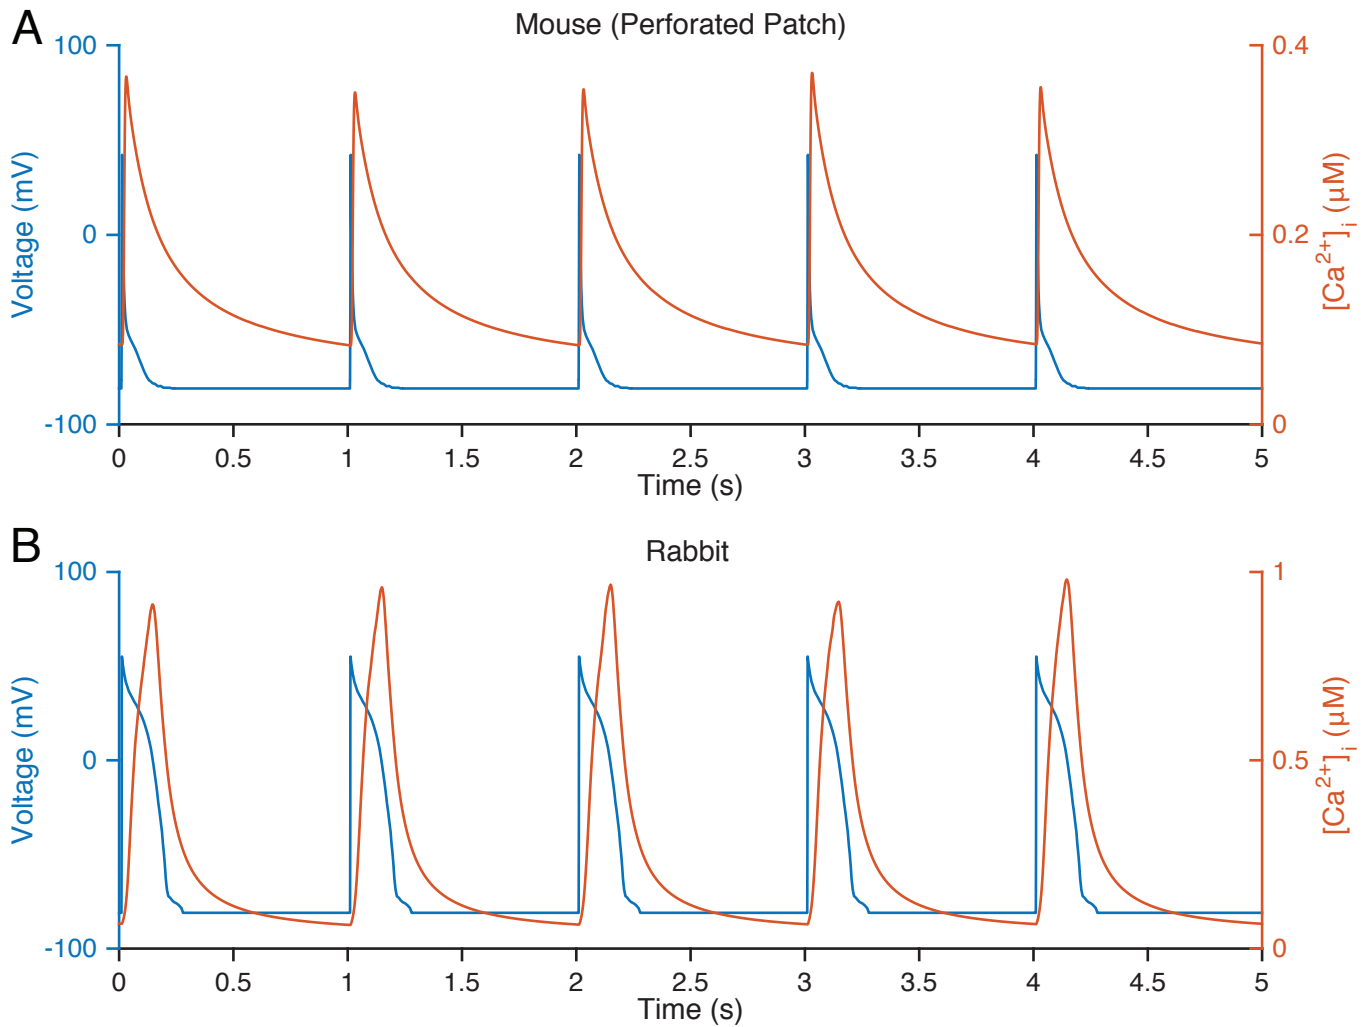

Figure S11: A)  $[Ca^{2+}]_i$  transients (right axis, red lines) generated by the model when membrane potential ( $V$ ) is clamped to an experimental, perforated-patch, mouse AP (left axis, blue line) (digitized from [3]). B)  $[Ca^{2+}]_i$  transients (right axis, red lines) generated by the model when membrane potential ( $V$ ) is clamped to an experimental, ruptured-patch, rabbit AP (left axis, blue line) (digitized from [4])

## References

- [1] Vladimir E Bondarenko, Gyula P Sziget, Glenna C L Bett, Song-Jung Kim, and Randall L Rasmusson. Computer model of action potential of mouse ventricular myocytes. *American journal of physiology Heart and circulatory physiology*, 287(3):H1378–403, September 2004.
- [2] Jeffrey J Fox, Jennifer L McHarg, and Robert F Gilmour. Ionic mechanism of electrical alternans. *American journal of physiology Heart and circulatory physiology*, 282(2):H516–30, February 2002.
- [3] R Macianskiene, V Bito, L Raeymaekers, B Brandts, K R Sipido, and K Mubagwa. Action potential changes associated with a slowed inactivation of cardiac voltage-gated sodium channels by KB130015. *British journal of pharmacology*, 139(8):1469–1479, August 2003.
- [4] J L Puglisi, W Yuan, J W Bassani, and D M Bers.  $\text{Ca}^{2+}$  influx through  $\text{Ca}^{2+}$  channels in rabbit ventricular myocytes during action potential clamp: influence of temperature. *Circulation research*, 85(6):e7–e16, September 1999.
- [5] Kenneth Tran, Nicolas P Smith, Denis S Loiselle, and Edmund J Crampin. A thermodynamic model of the cardiac sarcoplasmic/endoplasmic  $\text{Ca}^{2+}$  (SERCA) pump. *Biophysical journal*, 96(5):2029–2042, March 2009.
- [6] George S B Williams, Aristide C Chikando, Hoang-Trong M Tuan, Eric A Sobie, W J Lederer, and M Saleet Jafri. Dynamics of Calcium Sparks and Calcium Leak in the Heart. *Biophysical journal*, 101(6):1287–1296, September 2011.
- [7] George S B Williams, Marco A Huertas, Eric A Sobie, M Saleet Jafri, and Gregory D Smith. A probability density approach to modeling local control of calcium-induced calcium release in cardiac myocytes. *Biophysical journal*, 92(7):2311–2328, January 2007.
- [8] George S B Williams, Marco A Huertas, Eric A Sobie, M Saleet Jafri, and Gregory D Smith. Moment closure for local control models of calcium-induced calcium release in cardiac myocytes. *Biophysical journal*, 95(4):1689–1703, August 2008.
